# Supplementary material
Source: bioRxiv or medRxiv preprint supplement (https://www.biorxiv.org/highwire/filestream/45003/field_highwire_adjunct_files/0/137059-1.pdf)
Supplement: Supplementary file [file 137059-1.pdf]

## Supplementary Information for

### Improved Split Fluorescent Proteins for Endogenous Protein Labeling

Siyu Feng<sup>1</sup>, Sayaka Sekine<sup>2</sup>, Veronica Pessino<sup>3</sup>, Han Li<sup>4</sup>, Manuel D. Leonetti<sup>4</sup>, Bo Huang<sup>2, 5, 6\*</sup>

<sup>1</sup>The UC Berkeley-UCSF Graduate Program in Bioengineering, San Francisco, CA 94143 USA;

<sup>2</sup>Department of Pharmaceutical Chemistry, University of California in San Francisco, San Francisco, CA 94143, USA;

<sup>3</sup>Graduate Program of Biophysics, University of California, San Francisco, San Francisco, CA 94143, USA;

<sup>4</sup>Department of Cellular and Molecular Pharmacology, and Howard Hughes Medical Institute, University of California, San Francisco, San Francisco, CA 94143, USA;

<sup>5</sup>Department Biochemistry and Biophysics, University of California, San Francisco, San Francisco, CA 94143, USA.

<sup>6</sup>Chan Zuckerberg Biohub, San Francisco, CA 94158, USA

\* Correspondence should be addressed to [bo.huang@ucsf.edu](mailto:bo.huang@ucsf.edu).

a

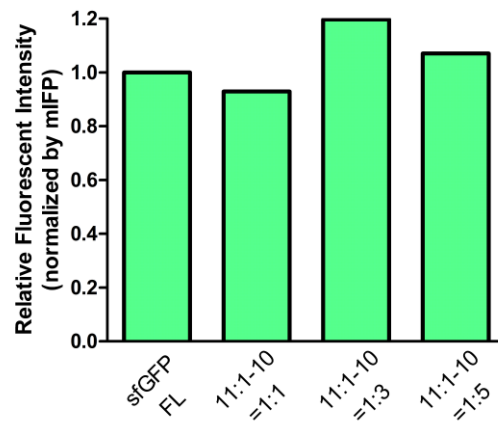

b

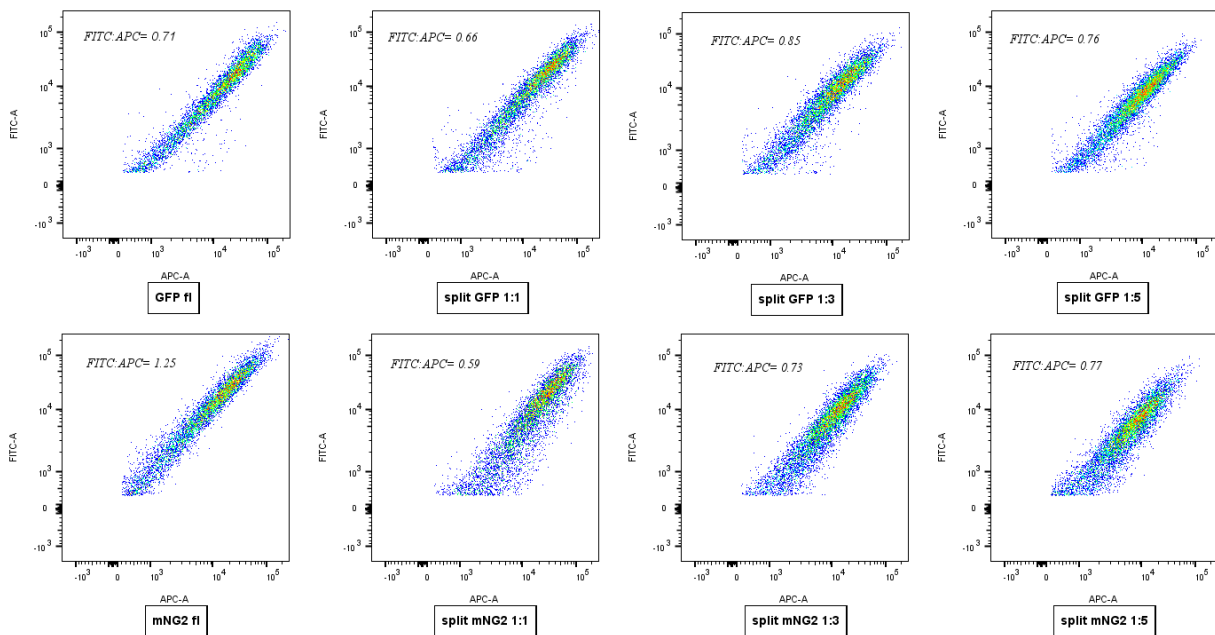

**Supplementary Figure 1 (a)** Whole cell fluorescence intensity of full length GFP and GFP<sub>11</sub>-CLTA/GFP<sub>1-10</sub>, measured by flow cytometry and normalized for expression level by mIFP fluorescence signal. Number of cells > 6000. **(b)** FACS raw data of bar graphs in Fig. 2e and Supplementary Fig. 1a. The X-axis is mIFP fluorescence intensity (ex=633 nm, em=710/50 nm) and the Y-axis is green fluorescence intensity (ex=488 nm, em=530/30 nm). The “FITC:APC” value is the population mean of green fluorescence normalized by mIFP fluorescence.

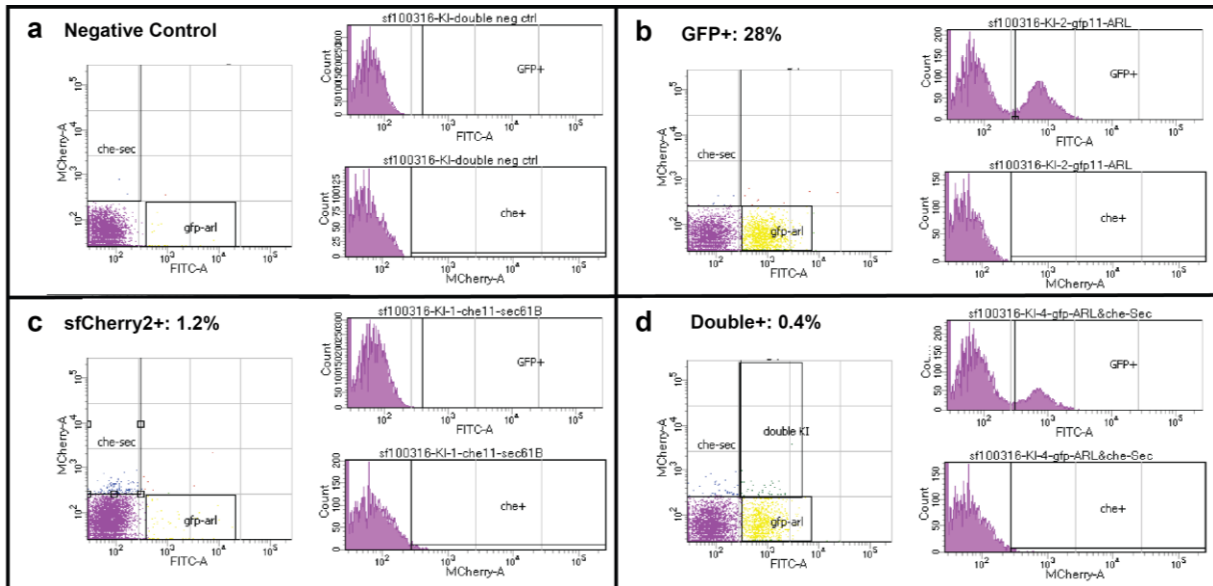

**Supplementary Figure 2.** FACS results of single knock-in or simultaneous double knock-in using GFP<sub>11</sub> or/and sfCherry2<sub>11</sub>. **(a)** Background fluorescence of HEK 293T cells stably expressing both GFP<sub>1-10</sub> and sfCherry2<sub>1-10</sub>. **(b)** Single knock-in of GFP<sub>11</sub> into ARL6IP1 with an efficiency of ~28% (GFP positive). **(c)** Single knock-in of sfCherry2<sub>11</sub> into Sec61B with an efficiency of ~1.2% (sfCherry2 positive). **(d)** Simultaneous double knock-in of GFP<sub>11</sub> and sfCherry2<sub>11</sub> into ARL6IP1 and Sec61B respectively, with an efficiency of ~0.4% (double positive).

ARL6IP1-sfCherry2<sub>11</sub>

Lysotracker staining

2-color merge

3-color merge (Sec61B)

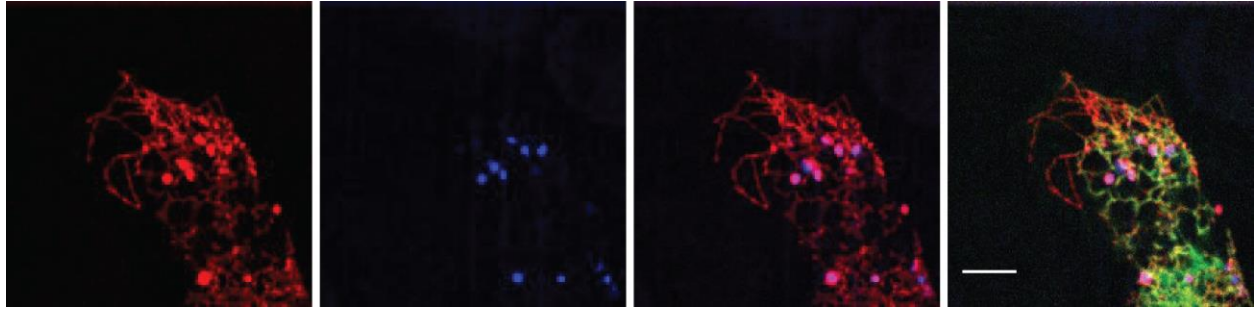

**Supplementary Figure 3.** Lysotracker live-cell staining visualize the colocalization of lysosomes and sfCherry2 puncta in the same ARL6IP1-sfCherry2<sub>11</sub>/Sec61B-GFP<sub>11</sub> knock-in HEK 293T cell shown in Figures 6a and 6b. Scale bar: 5  $\mu$ m.

**Supplementary Table 1: Sequence of mNG2<sub>1-10</sub>/mNG2<sub>11</sub>, sfCherry2<sub>1-10</sub>/sfCherry2<sub>11</sub>, PAsfCherry2<sub>1-10</sub> and 32-residue spacer in the screening construct.**

|                                   | DNA Sequence                                                                                                                                                                                                                                                                                                                                                                                                                                                                                                                                                                                                                                                                                         |
|-----------------------------------|------------------------------------------------------------------------------------------------------------------------------------------------------------------------------------------------------------------------------------------------------------------------------------------------------------------------------------------------------------------------------------------------------------------------------------------------------------------------------------------------------------------------------------------------------------------------------------------------------------------------------------------------------------------------------------------------------|
| <b>mNG2<sub>1-10</sub></b>        | ATGGTGAGCAAGGGTGAGGAGGATAACATGGCCTCTCTCCCAGCGACTCATGAGTTACA<br>CATCTTTGGCTCCATCAACGGTGTGGACTTTGACATGGTGGGTCAGGGTACCGGCAATC<br>CAAATGATGGTTATGAGGAGTTAAACCTGAAGTCCACCAAGGGTGACCTCCAGTTCTCCC<br>CCTGGATTCTGGTCCCTCATATCGGGTATGGCTTCCATCAGTACCTGCCCTACCCTGACG<br>GGATGTCGCCTTTCCAGGCCGCCATGGTAGATGGCTCCGGATACCAAGTCCATCGCACA<br>ATGCAGTTTGAAGATGGTGCCTCCCTTACTGTTAACTACCGCTACACCTACGAGGGAAGC<br>CACATCAAAGGAGAGGCCAGGTGATGGGGACTGGTTTCCCTGCTGACGGTCTGTGA<br>TGACCAACACGCTGACCGCTGCGGACTGGTGCATGTCGAAGAAGACTTACCCCAACGA<br>CAAAACCATCATCAGTACCTTTAAGTGGAGTTACACCACTGTAAATGGCAAACGCTACCG<br>GAGCACTGCGCGGACCACCTACACCTTGGCAAGCCAATGGCGGCTAACTATCTGAAGA<br>ACCAGCCGATGTACGTGTTCCGTAAGACGGAGCTCAAGCACTCCATG |
| <b>mNG2<sub>11</sub></b>          | ACCGAGCTCAACTTCAAGGAGTGGCAAAGGCCTTACCGATATGATG                                                                                                                                                                                                                                                                                                                                                                                                                                                                                                                                                                                                                                                       |
| <b>sfCherry2<sub>1-10</sub></b>   | ATGGAGGAGGACAACATGGCCATCATCAAGGAGTTCATGAGATTCAAGGTGCACATGGA<br>GGGCAGCGTGAACGGCCACGAGTTCGAGATCGAGGGCGAGGGCGAGGGCCACCCCTA<br>CGAGGGCACCCAGACCGCCAAGCTGAAGGTGACCAAGGGCGGCCCTGCCCTTCGC<br>CTGGGACATCCTGAGCCCCAGTTCATGTACGGCAGCAAGGCCTACGTGAAGCACCCC<br>GCCGACATCCCCGACTACCTGAAGCTGAGCTTCCCCGAGGGCTTACCTGGGAGAGAG<br>TGATGAACTTCGAGGACGGCGCGTGGTGACCGTGACCCAGGACAGCAGCCTGCAGG<br>ACGGCCAGTTCATCTACAAGGTGAAGCTGCTGGGCATCAACTTCCCCAGCGACGGCCC<br>CGTGATGCAGAAGAAGACCATGGGCTGGGAGGCCAGCACCGAGAGAATGTACCCCGAG<br>GACGGCGCCCTGAAGGGCGAGATCAACCAGAGACTGAAGCTGAAGGACGGCGGCCAC<br>TACGACGCCGAGGTGAAGACCACCTACAAGGCCAAGAAGCCCCTGCAGCTGCCCGGC<br>GCCTACAACGTGGACATCAAGCTGGACATCACCAAGCCACAACGAGGAC                 |
| <b>sfCherry2<sub>11</sub></b>     | TACACCATCGTGGAGCAGTACGAGAGAGCCGAGGCCAGACACAGCACC                                                                                                                                                                                                                                                                                                                                                                                                                                                                                                                                                                                                                                                     |
| <b>PAsfCherry2<sub>1-10</sub></b> | ATGGAGGAGGATAACATGGCCATCATTAAAGGAGTTCATGCGTTCAAGGTGCACATGGAG<br>GGGTCCGTGAACGGCCACGTGTTTCGAGATCGAGGGCGAGGGCGAGGGCCACCCCTAC<br>GAGGGCACCCAGACCGCCAAGCTGAAGGTGACCAAGGGTGGCCCCCTGCCCTTACC<br>TGGGACATCCTGTCCCCTCAATTCATGTACGGCTCCAATGCCTACGTGAAGCACCCCGC<br>CGACATCCCCGACTACTTTAAGCTGTCCTTCCCCGAGGGCTTACCTGGGAGCGCGTGA<br>TGAAATTCGAGGACGGCGGCGTGGTGACCGTGACCCAGGACTCCTCCCTGCAGGACG<br>GTCAGTTCATCTACAAGGTGAAGCTGCTGGGCATCAACTTCCCCCTCCGACGGCCCCGTA<br>ATGCAGAAGAAGACCATGGGCTGGGAGGCCCTCACCGAGCGGATGTACCCCGAGGACG<br>GCGCCCTGAAGGGCGAGGTCAACCCGAGAGTGAAGCTGAAGGACGGCGGCCACTACG<br>ACGCTGAGGTCAAGACCACCTACAAGGCCAAGAAGCCCCTGCAGCTGCCCGGCGCCTA<br>CAACGTCGACCGCAAGTTGGACATCACCTCACACAACGAGGAC             |
| <b>32-residue<br/>spacer</b>      | GACGTTGGTGGTGGCGGATCAGAAGGAGGCGGTAGCGGGGGCCCTGGTTCCGGGAGGG<br>GAAGGTTCTGCTGGGGGAGGGAGCGCTGGCGGGGGTCT                                                                                                                                                                                                                                                                                                                                                                                                                                                                                                                                                                                                 |

**Supplementary Table 2: sgRNA sequence**

| Target Gene | Target Term | Sequence of DNA oligo for sgRNA synthesis                   |
|-------------|-------------|-------------------------------------------------------------|
| SEC61B      | N           | TAATACGACTCACTATAGGCTTGTCTCCCTCTACAGCCGTTTAAGAGCTATGCTGGAA  |
| LMNA        | N           | TAATACGACTCACTATAGGCCATGGAGACCCCGTCCCAGGTTTAAGAGCTATGCTGGAA |
| CLTA        | N           | TAATACGACTCACTATAGGGCCATGGCGGGCAACTGAAGTTTAAGAGCTATGCTGGAA  |
| ARL6IP1     | N           | TAATACGACTCACTATAGGATCCCCGAGACGATGGCGGGTTTAAGAGCTATGCTGGAA  |
| RAB11A      | N           | TAATACGACTCACTATAGGGTAGTCGTA CTGTCGTCGGTTTAAGAGCTATGCTGGAA  |
| SPTLC1      | C           | TAATACGACTCACTATAGGGACTCTGCCTAGAGCAGGAGTTTAAGAGCTATGCTGGAA  |

**Supplementary Table 3: Oligo-nucleotide donor DNA sequence**

| Target Gene-FP <sub>11</sub> Tag | DNA sequence                                                                                                                                                                                                                             |
|----------------------------------|------------------------------------------------------------------------------------------------------------------------------------------------------------------------------------------------------------------------------------------|
| LMNA-mNG2 <sub>11</sub>          | TCCTTCGACCCGAGCCCCGCGCCCTTTCCGGGACCCCTGCCCCGC<br>GGGCAGCGCTGCCAACCTGCCGGCCATG <b>ACCGAGCTCAACTTCAAG</b><br><b>GAGTGGCAAAGGCCTTTACCGATATGATGGAGGTGGC</b> ATGGAGAC<br>CCCGTCCCAGCGGCGCGCCACCCGCAGCGGGGCGCAGGCCAGCT<br>CCTACTCCGCTGTCGCCCA  |
| CLTA-mNG2 <sub>11</sub>          | CGGGCGTGGTGTCTGGTGGGTCGGTTGGTTTTTGTCTCACCGTTGGT<br>GTCCGTGCCGTTTCAGTTGCCCGCCATG <b>ACCGAGCTCAACTTCAAGG</b><br><b>AGTGGCAAAGGCCTTTACCGATATGATGGAGGTGGC</b> ATGGCTGAG<br>CTGGATCCGTTCCGGCGCCCTGCCGGCGCCCTGGCGGTCCCGCG<br>CTGGGGAACGGAGTGG  |
| RAB11A-mNG2 <sub>11</sub>        | TGCAGCGACGCCCTGGTCCACAGATACCACTGCTGCTCCCGCCCTTTC<br>GCTCCTCGGCCGCGCAATG <b>ACCGAGCTCAACTTCAAGGAGTGGCAAAGGC</b><br><b>CTTTACCGATATGATGGTTCTGGC</b> GGCGGCACCCGCGACGACGAGTACGA<br>CTACCTCTTTAAAGGTGAGGCCATGGGCTCTCGCACTCTACACAGTC          |
| SPTLC1-mNG2 <sub>11</sub>        | GAACAAACAGAGGAAGAACTGGAGAGAGCTGCGTCCACCATCAAGGAGGTA<br>GCCCAGGCAGTTCTGCTCGGT <b>GGCTCTGGCACCGAGCTCAACTTCAAGGAG</b><br><b>TGGCAAAGGCCTTTACCGATATGATG</b> TAGGCAGAGTCCCGGGACCATGGCC<br>TCCTGCCACACAACACGCAGAGAGGACTCAAGACTCCCGCTGGCCA      |
| LMNA-sfCherry2 <sub>11</sub>     | TCCTTCGACCCGAGCCCCGCGCCCTTTCCGGGACCCCTGCCCCGC<br>GGGCAGCGCTGCCAACCTGCCGGCCATG <b>TACACCATCGTGGAGCAG</b><br><b>TACGAGAGAGCCGAGGCCAGACACAGCACCCGGTGGCGGC</b> GAGACC<br>CCGTCCCAGCGGCGCGCCACCCGCAGCGGGGCGCAGGCCAGCTC<br>CACTCCGCTGTCGCCACCC |
| ARL6IP1-sfCherry2 <sub>11</sub>  | GCGGGTTTCGGTTGGAGGACTCGTTGGGGAGGTGGCCTGCGCTTG<br>TAGAGACTGCATCCCCGAGACGATG <b>TACACCATCGTGGAGCAGTACC</b><br><b>AGAGAGCCGAGGCCAGACACAGCACCCGGTGGCGGC</b> GCGGAGGGA<br>GATAATCGCAGCACCAACCTGCTGGTGAGTCCTGGCTGCCTGTCCC<br>CCGGGAGCCGAGCGA   |
| SEC61B- sfCherry2 <sub>11</sub>  | GTGTCTAGGCCGGGGTTCTGGGGCAGGCCTGCCGCGCTCACCCGT<br>CTGTCTGCTTGTCTCCCTCTACAG <b>TACACCATCGTGGAGCAGTACGA</b><br><b>GAGAGCCGAGGCCAGACACAGCACCCGGTGGCGGC</b> CCTGGTCCGAC<br>CCCCAGTGGCACTAACGTGGGATCCTCAGGGCGCTCTCCAGCAA<br>GCAGTGGCCGCCCGGGC  |
| SEC61B-GFP <sub>11</sub>         | GTGTCTAGGCCGGGGTTCTGGGGCAGGCCTGCCGCGCTCACCCGT<br>CTGTCTGCTTGTCTCCCTCTACAG <b>CGTGACCACATGGTCTTTCATGA</b><br><b>GTATGTAAATGCTGCTGGGATTACAGGTGGCGGC</b> CCTGGTCCGACCC<br>CCAGTGGCACTAACGTGGGATCCTCAGGGCGCTCTCCAGCAAAGC<br>AGTGGCCGCCCGGGC  |

|                                                      |                                                                                                                                                                                                                                                                                                                                                                                                                                                                                                                                                               |
|------------------------------------------------------|---------------------------------------------------------------------------------------------------------------------------------------------------------------------------------------------------------------------------------------------------------------------------------------------------------------------------------------------------------------------------------------------------------------------------------------------------------------------------------------------------------------------------------------------------------------|
| sfCherry2 <sub>11</sub> -GFP <sub>11</sub> -<br>CLTA | AGCTGATAATACGACTCACTATAGGGCTCTGCAACACCGCCTAGACC<br>GACCGGATACACGGGTAGGGCTTCCGCTTTACCCGTCTCCCTCCTGG<br>CGCTTGTCTCCTCTCCCAGTCGGCACCACAGCGGTGGCTGCCGGG<br>CGTGGTGTTCGGTGGGTTCGGTTGGTTTTTGTCTCACCGTTGGTGTCC<br>GTGCCGTTTCAGTTGCCCGCCATGTACACCATCGTGGAGCAGTACGAG<br>AGAGCCGAGGCCAGACACAGCACCGGTGGCTCTGGAAGTTCAGGT<br>GGAGGCTCGCGTGACCACATGGTCCTTCATGAGTATGTAAATGCTGC<br>TGGGATTACAGGAGGCGGTATGGCTGAGCTGGATCCGTTCCGGCGCC<br>CCTGCCGGCGCCCCTGGCGGTCCCGCGCTGGGGAACGGAGTGGC<br>CGGCGCCGGCGAAGAAGACCCGGCTGCGGCCTTCTTGGCGCAGCA<br>AGAGAGCGAGATTGCGGGCATCGAGAACGACGAGGCCT |
|------------------------------------------------------|---------------------------------------------------------------------------------------------------------------------------------------------------------------------------------------------------------------------------------------------------------------------------------------------------------------------------------------------------------------------------------------------------------------------------------------------------------------------------------------------------------------------------------------------------------------|

mNG2<sub>11</sub> Sequence

sfCherry2<sub>11</sub> sequence

GFP<sub>11</sub> sequence

Linker sequence

Coding region sequence
